# Supplementary material
Source: PubMed Central journal article supplement (PMC3787131)
Supplement: supp_me.2013-1037_Binder1.pdf [file supp_me.2013-1037_Binder1.pdf]

### **Supplemental Figure Legends**

Fig S1. PPAR $\gamma$  expression in WT control and HVDRR cells. Cells were treated with vehicle, DIM or DIMR for 14 days. PPAR $\gamma$  expression was determined by real-time RT-PCR. Vehicle controls were set to 1. \* p<0.05, \*\* p<0.01, \*\*\* p<0.001.

Fig S2. NRBF1, CITED1 and CPT1b expression in HVDRR cells. Cells were differentiated with DIMR for 14 days. Expression levels were determined by real-time RT-PCR. Values for WT control cells were set to 1. \*\* p<0.01, \*\*\* p<0.001.

Fig S3. SMRT is not recruited to UCP1 VDRE4. ChIP analyses of SMRT binding to the UCP1 VDRE4 and osteocalcin (OC) VDRE in WT control cells treated with vehicle (0.1% ethanol) or 10 nM 1,25(OH) $_2$ D $_3$  for 6 hrs. \* p<0.05, \*\*\* p<0.001.

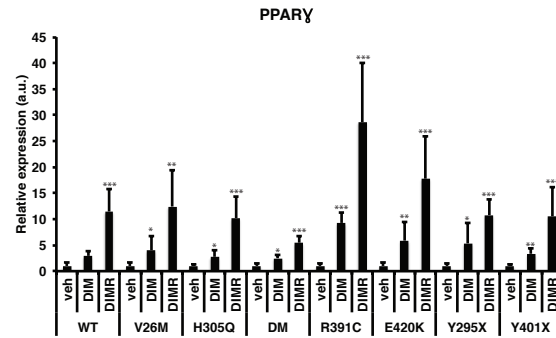

Fig. S1

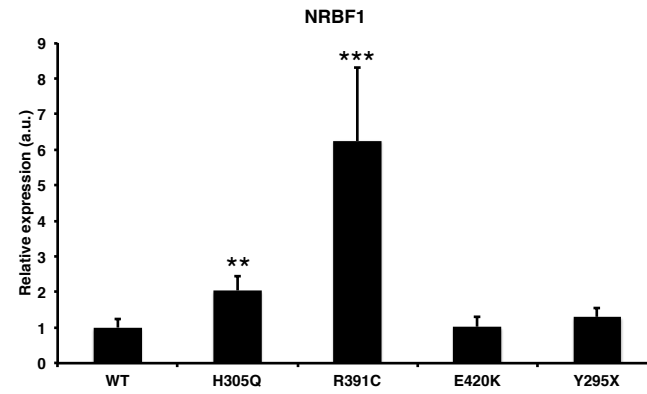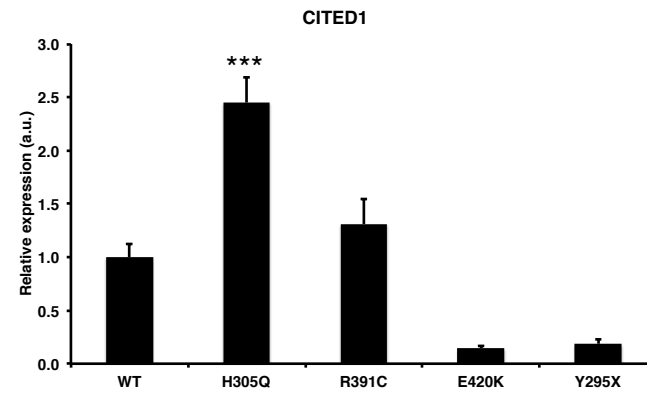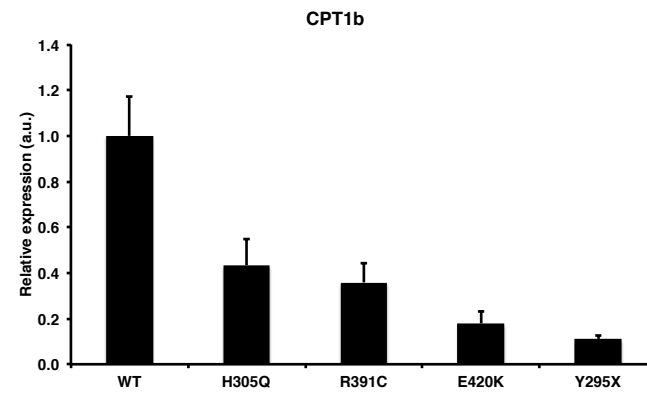

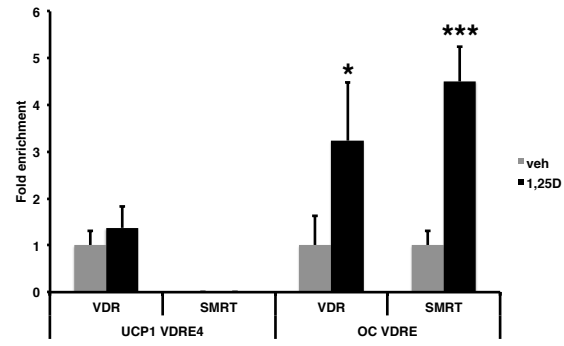

Fig. S3

Table S1.  
 QPCR primers

| Gene    | Upper Primer (5'-3')     | Lower Primer (5'-3')   |
|---------|--------------------------|------------------------|
| CYP24A1 | GGCTCTTTGTTGGATTGTCC     | AAACCAGCAGTGAACCCTGT   |
| PPARG   | GCAGGAGATCTACAAGGACTTG   | CCCTCAGAATAGTGCCTGG    |
| FABP4   | GGGGTGTCTTGGTACATGTGCA   | TCATGACGCATTCCACCACAGT |
| UCP1    | TCGGACGTACACCCGACCCTG    | TTCACCTTGGACCTGGAGCCG  |
| GAPDH   | GAAGGTGAAGGTCTGGAGTCA    | GATCTCGCTCCTGGAAGATG   |
| NRBF1   | TCCAGCCAAGGTCTGTCGAAGTCA | TTGCTGCCCACCGCTACCAC   |
| CPT1b   | ATCATGGCGTGGATGATGT      | CCTTCATGGTGAACAGCAA    |
| CITED1  | CAACCTTGCGGTGAAAGATCG    | GGAGAGCCTATTGGAGATCCC  |
| mUCP1   | ACTGCCACACCTCCAGTCATT    | CTTTGCCTCACTCAGGATTGG  |
| mRPL19  | AAATCGCCAATGCCAACTC      | TCTTCCCTATGCCCATATGC   |

Primers used in cloning UCP1 upstream sequence

| Name            | Sequence (5'-3')                  |
|-----------------|-----------------------------------|
| hUCP1pro +83-L  | CCTTCTCGAGTCCGCCAAGCACGCCGCTATTCC |
| hUCP1pro-984-L  | CCTTCTCGAGCTTGGCTCCAGGTCAGCTC     |
| hUCP1pro-2545-L | CCTTCTCGAGGAGGCTGATGGCTAAGCAGT    |
| hUCP1pro-4218-U | CAGGTACCTAACAGGGTATTTCCCAG        |

Primers used in deleting and mutating VDREs in UCP1 upstream sequence

| Name              | Sequence (5'-3')                  |
|-------------------|-----------------------------------|
| hUCP1-delVDRE1    | AGTACAGATGACTTTAGCTGGAGAGCTGCACCT |
| hUCP1-delVDRE1-r  | AGGTGCAGCTCTCCAGCTAAAGTCATCTGTACT |
| hUCP1-delVDRE2    | TACAGCCTCATCCCTCTCTCTTTCTTCCCC    |
| hUCP1-delVDRE2-r  | GGGGAAGAAAGAGAGAGGGGATGAGGCTGTA   |
| hUCP1-delVDRE3    | ACCTGTTGATAGCAGAACAAGGAATAAGGTCT  |
| hUCP1-delVDRE3-r  | AGACCTTATTCTTGTCTGTCTATCAACAGGT   |
| hUCP1-delVDRE4    | GGATCAGGAATTTAGCTTCTGCTTTACTGA    |
| hUCP1-delVDRE4-r  | TCAGTAAAGCAGAAGCTAAATTCCTGATCC    |
| hUCP1-VDRE4-G-C-U | TTAGACTGGGCTCAGCTACGCGATTCTTCTGC  |
| hUCP1-VDRE4-G-C-L | GCAGAAGAATCGCGTAGCTGAGCCCAGTCTAA  |

ChIP primers

| Name            | Sequence (5'-3')         |
|-----------------|--------------------------|
| hUCP1-VDRE4-U   | TCTCACAATTTTATGGATCAGGAA |
| hUCP1-VDRE4-L   | CACCAGGCACCAGAGTACAG     |
| hCYP24A1-VDRE-U | GCATCGCGATTGTGCAAG       |
| hCYP24A1-VDRE-L | GTGGAAGGAGGATGGAGTCA     |
| hOC-VDRE-U      | CCGGCTGACCTCATCTCCTG     |
| hOC-VDRE-L      | GCTGAGCTCTAGGGGAGTCT     |
